# Supplementary material for: Transcriptome analysis of the ependymal barrier during murine neurocysticercosis
Source: PubMed Central journal article supplement (PMC3527296; doi:10.1186/1742-2094-9-141), 2012-06-25
Supplement: 1742-2094-9-141-S1.pdf [file 1742-2094-9-141-S1.pdf]

| <b>Fold Change</b> | <b>ID</b> | <b>Symbol</b>               | <b>Entrez Gene Name</b>                                                  |
|--------------------|-----------|-----------------------------|--------------------------------------------------------------------------|
| 3.919              | NM_029639 | 1600029D21RIK               | RIKEN cDNA 1600029D21 gene                                               |
| 10.6               | NM_177146 | 9330175E14RIK               | RIKEN cDNA 9330175E14 gene                                               |
| 6.435              | NM_213615 | A530032D15RIK               | RIKEN cDNA A530032D15Rik gene                                            |
| -3.096             | NM_153416 | AAAS                        | achalasia, adrenocortical insufficiency, alacrimia (Allgrove, triple-A)  |
| 5.307              | XM_358306 | ABCC3                       | ATP-binding cassette, sub-family C (CFTR/MRP), member 3                  |
| 3.962              | NM_009593 | ABCG1                       | ATP-binding cassette, sub-family G (WHITE), member 1                     |
| -6.369             | NM_133225 | ACBD3                       | acyl-Coenzyme A binding domain containing 3                              |
| -2.488             | XM_484966 | ACBD7                       | acyl-Coenzyme A binding domain containing 7                              |
| -3.774             | NM_025790 | ACOT13                      | acyl-CoA thioesterase 13                                                 |
| 19.14              | NM_007398 | ADA                         | adenosine deaminase                                                      |
| -2.375             | NM_009623 | ADCY8                       | adenylate cyclase 8 (brain)                                              |
| 5.224              | NM_019467 | AIF1                        | allograft inflammatory factor 1                                          |
| 4.3                | NM_172393 | AIM1 (includes EG:202)      | absent in melanoma 1                                                     |
| -4.717             | NM_031185 | AKAP12                      | A kinase (PRKA) anchor protein 12                                        |
| 4.51               | NM_009663 | ALOX5AP                     | arachidonate 5-lipoxygenase-activating protein                           |
| 6.554              | NM_008486 | ANPEP                       | alanyl (membrane) aminopeptidase                                         |
| 2.128              | NM_013470 | ANXA3                       | annexin A3                                                               |
| 6.995              | NM_031159 | APOBEC1                     | apolipoprotein B mRNA editing enzyme, catalytic polypeptide 1            |
| 7.958              | XM_128064 | APOL9A (includes EG:223672) | apolipoprotein L 9a                                                      |
| -3.559             | NM_175105 | AQP11                       | aquaporin 11                                                             |
| 142.1              | NM_007482 | ARG1                        | arginase, liver                                                          |
| 8.326              | NM_146011 | ARHGAP9                     | Rho GTPase activating protein 9                                          |
| 6.104              | NM_007486 | ARHGDIB                     | Rho GDP dissociation inhibitor (GDI) beta                                |
| 2.343              | XM_129773 | ARPC2                       | actin related protein 2/3 complex, subunit 2, 34kDa                      |
| -4.149             | NM_133728 | ASNSD1                      | asparagine synthetase domain containing 1                                |
| -2.77              | NM_009721 | ATP1B1                      | ATPase, Na <sup>+</sup> /K <sup>+</sup> transporting, beta 1 polypeptide |
| -6.993             | NM_013727 | AZI2                        | 5-azacytidine induced 2                                                  |

|        |              |                            |                                                                                   |
|--------|--------------|----------------------------|-----------------------------------------------------------------------------------|
| 19.11  | NM_009735    | B2M                        | beta-2-microglobulin                                                              |
| 6.63   | XM_484142    | BAZ1A                      | bromodomain adjacent to zinc finger domain, 1A                                    |
| 7.021  | NM_007535    | BCL2A1C                    | B-cell leukemia/lymphoma 2 related protein A1c                                    |
| 5.164  | NM_009763    | BST1                       | bone marrow stromal cell antigen 1                                                |
| -2.179 | NM_138678    | BUTR1                      | butyrophilin related 1                                                            |
| 5.041  | NM_028732    | C10ORF54                   | chromosome 10 open reading frame 54                                               |
| 3.419  | NM_175219    | C130026I21RIK              | RIKEN cDNA C130026I21 gene                                                        |
| -2.353 | NM_199310    | C15ORF57                   | chromosome 15 open reading frame 57                                               |
| -2.227 | NM_175454    | C17ORF28                   | chromosome 17 open reading frame 28                                               |
| 6.214  | XM_131779    | C1ORF38                    | chromosome 1 open reading frame 38                                                |
| 3.096  | NM_007574    | C1QC                       | complement component 1, q subcomponent, C chain                                   |
| 5.826  | NM_023143    | C1R                        | complement component 1, r subcomponent                                            |
| -6.667 | NM_026124    | C20ORF24                   | chromosome 20 open reading frame 24                                               |
| 5.698  | NM_177645    | C2ORF67                    | chromosome 2 open reading frame 67                                                |
| 14.46  | NM_009778    | C3                         | complement component 3                                                            |
| 33.81  | NM_009779    | C3AR1                      | complement component 3a receptor 1                                                |
| 6.27   | NM_016704    | C6                         | complement component 6                                                            |
| 2.137  | XM_128587    | C6ORF106                   | chromosome 6 open reading frame 106                                               |
| 3.168  | NM_001012667 | C8ORF40                    | chromosome 8 open reading frame 40                                                |
| 3.629  | NM_021415    | CACNA1H                    | calcium channel, voltage-dependent, T type, alpha 1H subunit                      |
| -5.376 | NM_177407    | CAMK2A                     | calcium/calmodulin-dependent protein kinase II alpha                              |
| 2.78   | NM_007599    | CAPG                       | capping protein (actin filament), gelsolin-like                                   |
| 3.104  | NM_009807    | CASP1                      | caspase 1, apoptosis-related cysteine peptidase (interleukin 1, beta, convertase) |
| 23.37  | NM_009808    | CASP12 (includes EG:12364) | caspase 12                                                                        |

|         |           |         |                                                                                         |
|---------|-----------|---------|-----------------------------------------------------------------------------------------|
| 4.95    | NM_007609 | CASP4   | caspase 4, apoptosis-related cysteine peptidase                                         |
| 2.347   | NM_009811 | CASP6   | caspase 6, apoptosis-related cysteine peptidase                                         |
| 3.896   | NM_009812 | CASP8   | caspase 8, apoptosis-related cysteine peptidase                                         |
| 9.066   | NM_007621 | CBR2    | carbonyl reductase 2                                                                    |
| 2.57    | NM_172428 | CCDC134 | coiled-coil domain containing 134                                                       |
| 5.606   | NM_011330 | CCL11   | chemokine (C-C motif) ligand 11                                                         |
| 3.205   | NM_011333 | CCL13   | chemokine (C-C motif) ligand 13                                                         |
| 3.205   | NM_011333 | CCL2    | chemokine (C-C motif) ligand 2                                                          |
| 18.84   | NM_011331 | CCL12   | Small inducible cytokine A12 precursor (CCL12) (Monocyte chemotactic protein 5) (MCP-5) |
| 21.54   | NM_009139 | CCL6    | chemokine (C-C motif) ligand 6                                                          |
| 83.18   | NM_021443 | CCL8    | chemokine (C-C motif) ligand 8                                                          |
| 28.01   | NM_011338 | CCL9    | chemokine (C-C motif) ligand 9                                                          |
| -2.242  | NM_007637 | CCT5    | chaperonin containing TCP1, subunit 5 (epsilon)                                         |
| 5.226   | NM_021893 | CD274   | CD274 molecule                                                                          |
| 4.623   | NM_170758 | CD300A  | CD300a molecule                                                                         |
| 5.335   | NM_134158 | CD300C  | CD300c molecule                                                                         |
| 7.913   | NM_007645 | CD37    | CD37 molecule                                                                           |
| 7.023   | NM_013706 | CD52    | CD52 molecule                                                                           |
| 6.886   | NM_007651 | CD53    | CD53 molecule                                                                           |
| 14.57   | NM_009853 | CD68    | CD68 molecule                                                                           |
| 126.8   | NM_010545 | CD74    | CD74 molecule, major histocompatibility complex, class II invariant chain               |
| 2.522   | NM_007669 | CDKN1A  | cyclin-dependent kinase inhibitor 1A (p21, Cip1)                                        |
| 3.809   | NM_009883 | CEBPB   | CCAAT/enhancer binding protein (C/EBP), beta                                            |
| -17.007 | XM_129027 | CEP76   | centrosomal protein 76kDa                                                               |
| 10.21   | NM_008198 | CFB     | complement factor B                                                                     |
| -4.237  | NM_009900 | CLCN2   | chloride channel 2                                                                      |
| 4.381   | NM_010796 | CLEC10A | C-type lectin domain family 10, member A                                                |
| 11.53   | NM_199311 | CLEC4A1 | C-type lectin domain family 4, member a1                                                |
| -2.481  | NM_175448 | CLVS2   | clavesin 2                                                                              |
| 7.567   | NM_010780 | CMA1    | chymase 1, mast cell                                                                    |
| 2.771   | NM_020557 | CMPK2   | cytidine monophosphate (UMP-CMP) kinase 2, mitochondrial                                |

|        |           |                         |                                                                                                               |
|--------|-----------|-------------------------|---------------------------------------------------------------------------------------------------------------|
| 2.192  | NM_024217 | CMTM3                   | CKLF-like MARVEL transmembrane domain containing 3                                                            |
| -2.874 | NM_009953 | CRHR2                   | corticotropin releasing hormone receptor 2                                                                    |
| -2.193 | NM_009964 | CRYAB                   | crystallin, alpha B                                                                                           |
| 5.564  | NM_007781 | CSF2RB                  | colony stimulating factor 2 receptor, beta, low-affinity (granulocyte-macrophage)                             |
| 3.209  | NM_007782 | CSF3R                   | colony stimulating factor 3 receptor (granulocyte)                                                            |
| 14.17  | NM_007798 | CTSB                    | cathepsin B                                                                                                   |
| 5.139  | NM_009983 | CTSD                    | cathepsin D                                                                                                   |
| 8.947  | NM_009984 | CTSL2                   | cathepsin L2                                                                                                  |
| 21.16  | NM_021281 | CTSS                    | cathepsin S                                                                                                   |
| 9.37   | NM_022325 | CTSZ (includes EG:1522) | cathepsin Z                                                                                                   |
| 2.929  | NM_021274 | CXCL10                  | chemokine (C-X-C motif) ligand 10                                                                             |
| 21.73  | NM_019494 | CXCL11                  | chemokine (C-X-C motif) ligand 11                                                                             |
| 2.996  | NM_023118 | DAB2                    | disabled homolog 2, mitogen-responsive phosphoprotein (Drosophila)                                            |
| 5.326  | NM_172689 | DDX58                   | DEAD (Asp-Glu-Ala-Asp) box polypeptide 58                                                                     |
| 5.647  | XM_358375 | DDX60                   | DEAD (Asp-Glu-Ala-Asp) box polypeptide 60                                                                     |
| -2.008 | NM_178681 | DGKB                    | diacylglycerol kinase, beta 90kDa                                                                             |
| 3.12   | NM_030150 | DHX58                   | DEXH (Asp-Glu-X-His) box polypeptide 58                                                                       |
| -3.03  | NM_015789 | DKKL1                   | dickkopf-like 1 (soggy)                                                                                       |
| 2.943  | NM_010071 | DOK2                    | docking protein 2, 56kDa                                                                                      |
| 3.482  | NM_013739 | DOK3                    | docking protein 3                                                                                             |
| 2.218  | NM_007875 | DPAGT1                  | dolichyl-phosphate (UDP-N-acetylglucosamine) N-acetylglucosaminophosphotransferase 1 (GlcNAc-1-P transferase) |
| 3.998  | NM_176913 | DPEP2                   | dipeptidase 2                                                                                                 |
| 3.025  | NM_027878 | DRAM1                   | DNA-damage regulated autophagy modulator 1                                                                    |
| -3.413 | NM_010080 | DSPP                    | dentin sialophosphoprotein                                                                                    |
| 3.114  | NM_019819 | DUSP14                  | dual specificity phosphatase 14                                                                               |
| 13.17  | NM_007895 | EAR2                    | eosinophil-associated, ribonuclease A family, member 2                                                        |
| 2.745  | NM_025994 | EFHD2                   | EF-hand domain family, member D2                                                                              |
| -2.392 | NM_153078 | EHBP1                   | EH domain binding protein 1                                                                                   |

|        |           |                             |                                                                                                            |
|--------|-----------|-----------------------------|------------------------------------------------------------------------------------------------------------|
| 5.433  | NM_133838 | EHD4                        | EH-domain containing 4                                                                                     |
| 13     | NM_145158 | EMILIN2                     | elastin microfibril interfacier 2                                                                          |
| 3.989  | NM_010129 | EMP3                        | epithelial membrane protein 3                                                                              |
| 4.32   | NM_010130 | EMR1                        | egf-like module containing, mucin-like,<br>hormone receptor-like 1                                         |
| 4.321  | NM_199016 | ENPP4                       | ectonucleotide<br>pyrophosphatase/phosphodiesterase 4<br>(putative function)                               |
| 3.59   | NM_010161 | EVI2A                       | ecotropic viral integration site 2A                                                                        |
| 3.317  | NM_207214 | EXOC5                       | exocyst complex component 5                                                                                |
| -2.309 | NM_021272 | FABP7                       | fatty acid binding protein 7, brain                                                                        |
| -3.165 | NM_028224 | FAIM2                       | Fas apoptotic inhibitory molecule 2                                                                        |
| 2.232  | XM_135029 | FAM46A                      | family with sequence similarity 46, member<br>A                                                            |
| 2.396  | NM_144846 | FAM49B                      | family with sequence similarity 49, member<br>B                                                            |
| 2.29   | NM_023229 | FASTK                       | Fas-activated serine/threonine kinase                                                                      |
| 9.533  | NM_010186 | FCGR1A                      | Fc fragment of IgG, high affinity Ia, receptor<br>(CD64)                                                   |
| 6.96   | NM_010188 | FCGR2A                      | Fc fragment of IgG, low affinity IIa, receptor<br>(CD32)                                                   |
| 6.288  | NM_010189 | FCGRT                       | Fc fragment of IgG, receptor, transporter,<br>alpha                                                        |
| -2.959 | NM_199012 | FCHSD2                      | FCH and double SH3 domains 2                                                                               |
| 4.039  | NM_008013 | FGL2                        | fibrinogen-like 2                                                                                          |
| 13.49  | NM_010233 | FN1                         | fibronectin 1                                                                                              |
| 3.102  | NM_009146 | FRRS1                       | ferric-chelate reductase 1                                                                                 |
| 3.594  | NM_027759 | FSIP1                       | fibrous sheath interacting protein 1                                                                       |
| 2.939  | NM_010240 | FTL                         | ferritin, light polypeptide                                                                                |
| 3.977  | NM_172451 | GALNT6                      | UDP-N-acetyl-alpha-D-<br>galactosamine:polypeptide N-<br>acetylgalactosaminyltransferase 6 (GalNAc-<br>T6) |
| 17.3   | NM_025961 | GATM                        | glycine amidinotransferase (L-<br>arginine:glycine amidinotransferase)                                     |
| 10.13  | NM_010259 | GBP1 (includes<br>EG:14468) | guanylate binding protein 1                                                                                |
| 10.52  | NM_008620 | GBP4 (includes<br>EG:17472) | guanylate binding protein 4                                                                                |
| 3.357  | NM_145545 | GBP7                        | guanylate binding protein 7                                                                                |
| -2.119 | NM_144909 | GCKR                        | glucokinase (hexokinase 4) regulator                                                                       |
| 2.141  | NM_027450 | GLIPR2                      | GLI pathogenesis-related 2                                                                                 |
| 2.406  | XM_357752 | GM5331                      | predicted gene 5331                                                                                        |
| 9.939  | NM_022024 | GMFG                        | glia maturation factor, gamma                                                                              |

|        |              |                           |                                                                                          |
|--------|--------------|---------------------------|------------------------------------------------------------------------------------------|
| 3.246  | NM_023121    | GNGT2                     | guanine nucleotide binding protein (G protein), gamma transducing activity polypeptide 2 |
| 3.032  | NM_029868    | GPBP1L1                   | GC-rich promoter binding protein 1-like 1                                                |
| 2.782  | NM_173398    | GPR171                    | G protein-coupled receptor 171                                                           |
| 13.63  | NM_022320    | GPR35                     | G protein-coupled receptor 35                                                            |
| 6.645  | NM_134116    | GPSM3                     | G-protein signaling modulator 3 (AGS3-like, <i>C. elegans</i> )                          |
| -4.525 | NM_008165    | GRIA1                     | glutamate receptor, ionotropic, AMPA 1                                                   |
| 2.564  | NM_026960    | GSDMD                     | gasdermin D                                                                              |
| 6.3    | NM_010368    | GUSB                      | glucuronidase, beta                                                                      |
| 14.81  | NM_029000    | GVIN1                     | GTPase, very large interferon inducible 1                                                |
| 7.614  | NM_023124    | H2-Q8                     | histocompatibility 2, Q region locus 8                                                   |
| 8.501  | NM_010397    | H2-T22                    | histocompatibility 2, T region locus 22                                                  |
| 27.78  | NM_010399    | H2-T9 (includes EG:15051) | histocompatibility 2, T region locus 9                                                   |
| 4.812  | NM_010401    | HAL                       | histidine ammonia-lyase                                                                  |
| -3.367 | NM_008220    | HBB (includes EG:3043)    | hemoglobin, beta                                                                         |
| 2.916  | NM_001042593 | HBS1L                     | HBS1-like ( <i>S. cerevisiae</i> )                                                       |
| 5.818  | NM_010407    | HCK                       | hemopoietic cell kinase                                                                  |
| 4.113  | NM_010421    | HEXA                      | hexosaminidase A (alpha polypeptide)                                                     |
| 5.739  | NM_010422    | HEXB                      | hexosaminidase B (beta polypeptide)                                                      |
| 2.555  | NM_013820    | HK2                       | hexokinase 2                                                                             |
| 36.35  | NM_010394    | HLA-B                     | major histocompatibility complex, class I, B                                             |
| 53.43  | NM_010380    | HLA-C                     | major histocompatibility complex, class I, C                                             |
| 4.897  | NM_010386    | HLA-DMA                   | major histocompatibility complex, class II, DM alpha                                     |
| 30.6   | NM_010378    | HLA-DQA1                  | major histocompatibility complex, class II, DQ alpha 1                                   |
| 15.49  | NM_207105    | HLA-DQB1                  | major histocompatibility complex, class II, DQ beta 1                                    |
| 16.41  | NM_010381    | HLA-DRA                   | major histocompatibility complex, class II, DR alpha                                     |
| 39.98  | NM_010398    | HLA-E                     | major histocompatibility complex, class I, E                                             |

|        |              |         |                                                   |
|--------|--------------|---------|---------------------------------------------------|
| 5.334  | NM_013819    | HLA-G   | major histocompatibility complex, class I, G      |
| 2.185  | NM_177338    | HMBOX1  | homeobox containing 1                             |
| 4.211  | NM_027521    | HMHA1   | histocompatibility (minor) HA-1                   |
| 4.796  | NM_010442    | HMOX1   | heme oxygenase (decycling) 1                      |
| -2.513 | NM_198937    | HN1L    | hematological and neurological expressed 1-like   |
| 2.352  | NM_017370    | HP      | haptoglobin                                       |
| 16.96  | NM_152803    | HPSE    | heparanase                                        |
| 2.949  | XM_136108    | HUWE1   | HECT, UBA and WWE domain containing 1             |
| 15.89  | NM_008329    | IFI16   | interferon, gamma-inducible protein 16            |
| 11.25  | NM_008327    | IFI202B | interferon activated gene 202B                    |
| 6.55   | NM_008328    | IFI203  | interferon activated gene 203                     |
| 4.182  | NM_194067    | IFI27   | interferon, alpha-inducible protein 27            |
| 9.562  | NM_023065    | IFI30   | interferon, gamma-inducible protein 30            |
| 12.23  | NM_133871    | IFI44   | interferon-induced protein 44                     |
| 5.47   | NM_031367    | IFI44L  | interferon-induced protein 44-like                |
| 29.79  | NM_008330    | IFI47   | interferon gamma inducible protein 47             |
| 3.182  | NM_025378    | IFITM3  | interferon induced transmembrane protein 3 (1-8U) |
| 4.133  | NM_184052    | IGF1    | insulin-like growth factor 1 (somatomedin C)      |
| 17.5   | NM_018738    | IGTP    | interferon gamma induced GTPase                   |
| 23.89  | NM_021792    | IIGP1   | interferon inducible GTPase 1                     |
| 24.41  | NM_008348    | IL10RA  | interleukin 10 receptor, alpha                    |
| 10.63  | NM_010531    | IL18BP  | interleukin 18 binding protein                    |
| 2.787  | NM_001025602 | IL1RL1  | interleukin 1 receptor-like 1                     |
| -3.289 | NM_139299    | IL31RA  | interleukin 31 receptor A                         |
| 4.204  | NM_010566    | INPP5D  | inositol polyphosphate-5-phosphatase, 145kDa      |
| 4.178  | NM_008390    | IRF1    | interferon regulatory factor 1                    |
| 9.868  | NM_012057    | IRF5    | interferon regulatory factor 5                    |
| 3.108  | NM_016850    | IRF7    | interferon regulatory factor 7                    |
| 8.085  | NM_019440    | IRGM2   | immunity-related GTPase family M member 2         |
| 6.205  | NM_015783    | ISG15   | ISG15 ubiquitin-like modifier                     |
| -2.242 | NM_026158    | ISOC2B  | isochorismatase domain containing 2b              |
| 2.96   | NM_008413    | JAK2    | Janus kinase 2                                    |
| -2.506 | NM_153572    | KATNAL1 | katanin p60 subunit A-like 1                      |

|        |           |           |                                                                                          |
|--------|-----------|-----------|------------------------------------------------------------------------------------------|
| -4.274 | NM_172615 | KIAA0226  | KIAA0226                                                                                 |
| -3.135 | NM_172741 | KIAA0355  | KIAA0355                                                                                 |
| -3.436 | NM_153584 | KIAA1370  | KIAA1370                                                                                 |
| 3.893  | XM_283973 | KIAA1797  | KIAA1797                                                                                 |
| 4.014  | NM_031180 | KLB       | klotho beta                                                                              |
| 2.135  | NM_013692 | KLF10     | Kruppel-like factor 10                                                                   |
| 6.32   | NM_010686 | LAPTM5    | lysosomal protein transmembrane 5                                                        |
| 2.141  | NM_022964 | LAT2      | linker for activation of T cells family, member 2                                        |
| 4.759  | NM_008491 | LCN2      | lipocalin 2                                                                              |
| 4.351  | NM_008879 | LCP1      | lymphocyte cytosolic protein 1 (L-plastin)                                               |
| 2.554  | NM_008495 | LGALS1    | lectin, galactoside-binding, soluble, 1                                                  |
| 5.194  | NM_010705 | LGALS3    | lectin, galactoside-binding, soluble, 3                                                  |
| 8.717  | NM_011150 | LGALS3BP  | lectin, galactoside-binding, soluble, 3 binding protein                                  |
| 4.473  | NM_010708 | LGALS9    | lectin, galactoside-binding, soluble, 9                                                  |
| 3.059  | NM_144556 | LGI4      | leucine-rich repeat LGI family, member 4                                                 |
| 4.085  | NM_011095 | LILRA6    | leukocyte immunoglobulin-like receptor, subfamily A (with TM domain), member 6           |
| 14     | NM_008147 | LILRB4    | leukocyte immunoglobulin-like receptor, subfamily B (with TM and ITIM domains), member 4 |
| -2.273 | NM_181074 | LINGO1    | leucine rich repeat and Ig domain containing 1                                           |
| 7.901  | NM_021460 | LIPA      | lipase A, lysosomal acid, cholesterol esterase                                           |
| 3.282  | NM_019980 | LITAF     | lipopolysaccharide-induced TNF factor                                                    |
| 5.269  | NM_172827 | LNPEP     | leucyl/cystinyl aminopeptidase                                                           |
| 3.223  | XM_486478 | LOC434624 | similar to Ferritin light chain 1 (Ferritin L subunit 1)                                 |
| 9.397  | NM_134152 | LPXN      | leupaxin                                                                                 |
| 6.56   | NM_153074 | LRRC25    | leucine rich repeat containing 25                                                        |
| 19.78  | NM_146069 | LRRC33    | leucine rich repeat containing 33                                                        |
| 11.38  | NM_010738 | LY6A      | lymphocyte antigen 6 complex, locus A                                                    |
| 9.951  | NM_010741 | LY6C1     | lymphocyte antigen 6 complex, locus C1                                                   |
| 6.026  | NM_008529 | LY6E      | lymphocyte antigen 6 complex, locus E                                                    |
| 16.29  | NM_017372 | LYZ       | lysozyme (renal amyloidosis)                                                             |



|        |           |         |                                                                                  |
|--------|-----------|---------|----------------------------------------------------------------------------------|
| 8.244  | NM_010658 | MAFB    | v-maf musculoaponeurotic fibrosarcoma oncogene homolog B (avian)                 |
| 4.029  | NM_010764 | MAN2B1  | mannosidase, alpha, class 2B, member 1                                           |
| 3.232  | NM_029103 | MANF    | mesencephalic astrocyte-derived neurotrophic factor                              |
| 2.243  | NM_011952 | MAPK3   | mitogen-activated protein kinase 3                                               |
| -2.415 | NM_153058 | MAPRE2  | microtubule-associated protein, RP/EB family, member 2                           |
| -5.348 | NM_008590 | MEST    | mesoderm specific transcript homolog (mouse)                                     |
| 2.8    | NM_144797 | METRNL  | meteorin, glial cell differentiation regulator-like                              |
| -6.849 | NM_172567 | METTL2B | methyltransferase like 2B                                                        |
| 20.55  | NM_008605 | MMP12   | matrix metalloproteinase 12 (macrophage elastase)                                |
| 18.68  | XM_134619 | MMP27   | matrix metalloproteinase 27                                                      |
| 12.01  | XM_129176 | MPEG1   | macrophage expressed 1                                                           |
| -3.953 | NM_007962 | MPZL2   | myelin protein zero-like 2                                                       |
| 7.893  | NM_008625 | MRC1L1  | mannose receptor, C type 1-like 1                                                |
| 5.107  | XM_354744 | MRS2    | MRS2 magnesium homeostasis factor homolog ( <i>S. cerevisiae</i> )               |
| 3.823  | NM_029499 | MS4A4C  | membrane-spanning 4-domains, subfamily A, member 4C                              |
| 13.7   | NM_027836 | MS4A7   | membrane-spanning 4-domains, subfamily A, member 7                               |
| 8.177  | NM_022430 | MS4A8B  | membrane-spanning 4-domains, subfamily A, member 8B                              |
| -2.66  | NM_008629 | MSI1    | musashi homolog 1 ( <i>Drosophila</i> )                                          |
| 4.428  | NM_010836 | MSX3    | homeobox, msh-like 3                                                             |
| 4.937  | NM_026829 | MTHFS   | 5,10-methenyltetrahydrofolate synthetase (5-formyltetrahydrofolate cyclo-ligase) |
| -2.062 | NM_138656 | MVD     | mevalonate (diphospho) decarboxylase                                             |
| 25.6   | NM_010846 | MX2     | myxovirus (influenza virus) resistance 2 (mouse)                                 |
| 7.626  | NM_053214 | MYO1F   | myosin IF                                                                        |
| -2     | NM_133939 | NAA38   | N(alpha)-acetyltransferase 38, NatC auxiliary subunit                            |
| 2.258  | NM_013796 | NAGPA   | N-acetylglucosamine-1-phosphodiester alpha-N-acetylglucosaminidase               |

|        |           |         |                                                                             |
|--------|-----------|---------|-----------------------------------------------------------------------------|
| 5.754  | NM_010871 | NAIP    | NLR family, apoptosis inhibitory protein                                    |
| 3.008  | NM_021524 | NAMPT   | nicotinamide phosphoribosyltransferase                                      |
| -2.079 | XM_132755 | NANOG   | Nanog homeobox                                                              |
| 16.04  | NM_010876 | NCF1    | neutrophil cytosolic factor 1                                               |
| 3.171  | NM_008677 | NCF4    | neutrophil cytosolic factor 4, 40kDa                                        |
| 2.183  | NM_010902 | NFE2L2  | nuclear factor (erythroid-derived 2)-like 2                                 |
| -3.636 | NM_008694 | NGP     | neutrophilic granule protein                                                |
| 4.029  | NM_023409 | NPC2    | Niemann-Pick disease, type C2                                               |
| 4.13   | NM_199469 | NPLOC4  | nuclear protein localization 4 homolog (S. cerevisiae)                      |
| -4     | NM_183261 | NR2F2   | nuclear receptor subfamily 2, group F, member 2                             |
| -2.193 | NM_021717 | NRIP2   | nuclear receptor interacting protein 2                                      |
| 2.165  | NM_019738 | NUPR1   | nuclear protein, transcriptional regulator, 1                               |
| 3.853  | NM_145227 | OAS2    | 2'-5'-oligoadenylate synthetase 2, 69/71kDa                                 |
| 9.382  | NM_145209 | OASL    | 2'-5'-oligoadenylate synthetase-like                                        |
| 15.52  | NM_011854 | OASL2   | 2'-5' oligoadenylate synthetase-like 2                                      |
| 4.267  | NM_133859 | OLFML3  | olfactomedin-like 3                                                         |
| -2.062 | NM_147055 | OLFR649 | olfactory receptor 649                                                      |
| -20.08 | NM_194268 | ONECUT2 | one cut homeobox 2                                                          |
| 7.547  | NM_146278 | OR4K5   | olfactory receptor, family 4, subfamily K, member 5                         |
| 4.345  | NM_011019 | OSMR    | oncostatin M receptor                                                       |
| 4.798  | NM_017375 | OSTF1   | osteoclast stimulating factor 1                                             |
| 12.4   | NM_183168 | P2RY6   | pyrimidinergic receptor P2Y, G-protein coupled, 6                           |
| 5.203  | NM_172893 | PARP12  | poly (ADP-ribose) polymerase family, member 12                              |
| 5.213  | XM_488522 | PARP14  | poly (ADP-ribose) polymerase family, member 14                              |
| -6.803 | NM_029078 | PCF11   | PCF11, cleavage and polyadenylation factor subunit, homolog (S. cerevisiae) |
| 3.986  | NM_011052 | PDCD6IP | programmed cell death 6 interacting protein                                 |
| 2.274  | NM_027924 | PDGFD   | platelet derived growth factor D                                            |
| 2.266  | NM_009787 | PDIA4   | protein disulfide isomerase family A, member 4                              |

|        |           |                             |                                                                                           |
|--------|-----------|-----------------------------|-------------------------------------------------------------------------------------------|
| -2.427 | NM_020271 | PDXP (includes EG:57026)    | pyridoxal (pyridoxine, vitamin B6) phosphatase                                            |
| 2.633  | NM_019703 | PFKP                        | phosphofructokinase, platelet                                                             |
| 7.39   | NM_008842 | PIM1                        | pim-1 oncogene                                                                            |
| 4.416  | NM_133792 | PLA2G15                     | phospholipase A2, group XV                                                                |
| 9.395  | NM_139198 | PLAC8                       | placenta-specific 8                                                                       |
| 18.02  | NM_019549 | PLEK                        | pleckstrin                                                                                |
| 2.066  | NM_019755 | PLP2                        | proteolipid protein 2 (colonic epithelium-enriched)                                       |
| 2.93   | NM_028199 | PLXDC1                      | plexin domain containing 1                                                                |
| -2.494 | NM_026164 | PNPLA8                      | patatin-like phospholipase domain containing 8                                            |
| 2.592  | NM_027196 | POLD4                       | polymerase (DNA-directed), delta 4                                                        |
| 2.688  | NM_017401 | POLM                        | polymerase (DNA directed), mu                                                             |
| 3.885  | NM_011103 | PRKCD                       | protein kinase C, delta                                                                   |
| 2.683  | NM_011173 | PROS1                       | protein S (alpha)                                                                         |
| 31.33  | NM_010724 | PSMB8                       | proteasome (prosome, macropain) subunit, beta type, 8 (large multifunctional peptidase 7) |
| 74.76  | NM_013585 | PSMB9                       | proteasome (prosome, macropain) subunit, beta type, 9 (large multifunctional peptidase 2) |
| 3.699  | NM_011201 | PTPN1                       | protein tyrosine phosphatase, non-receptor type 1                                         |
| 2.648  | NM_175026 | PYHIN1 (includes EG:236312) | pyrin and HIN domain family, member 1                                                     |
| -2.513 | NM_009001 | RAB3A                       | RAB3A, member RAS oncogene family                                                         |
| 2.011  | NM_022327 | RALB                        | v-ral simian leukemia viral oncogene homolog B (ras related; GTP binding protein)         |
| 2.541  | XM_128924 | RBM27                       | RNA binding motif protein 27                                                              |
| 12.06  | NM_020509 | RETNLA                      | resistin like alpha                                                                       |
| 2.35   | NM_026418 | RGS10                       | regulator of G-protein signaling 10                                                       |
| 3.47   | NM_172572 | RHBDF2                      | rhomboid 5 homolog 2 (Drosophila)                                                         |
| 3.175  | NM_019566 | RHOG                        | ras homolog gene family, member G (rho G)                                                 |
| 2.376  | NM_133955 | RHOU                        | ras homolog gene family, member U                                                         |
| 5.332  | NM_021384 | RSAD2                       | radical S-adenosyl methionine domain containing 2                                         |
| -5.814 | NM_028351 | RSPO3                       | R-spondin 3 homolog (Xenopus laevis)                                                      |
| -2.012 | NM_007901 | S1PR1                       | sphingosine-1-phosphate receptor 1                                                        |

|         |           |           |                                                                                                   |
|---------|-----------|-----------|---------------------------------------------------------------------------------------------------|
| 77.66   | NM_011315 | SAA1      | serum amyloid A1                                                                                  |
| 6.945   | NM_028773 | SASH3     | SAM and SH3 domain containing 3                                                                   |
| 2.225   | NM_009121 | SAT1      | spermidine/spermine N1-acetyltransferase 1                                                        |
| -2.183  | NM_009162 | SCG5      | secretogranin V (7B2 protein)                                                                     |
| 3.849   | NM_022324 | SDF2L1    | stromal cell-derived factor 2-like 1                                                              |
| -2.008  | NM_144520 | SEC14L2   | SEC14-like 2 ( <i>S. cerevisiae</i> )                                                             |
| 7.997   | NM_009252 | SERPINA3  | serpin peptidase inhibitor, clade A (alpha-1 antiproteinase, antitrypsin), member 3               |
| 6.262   | NM_009251 | SERPINA3G | serine (or cysteine) peptidase inhibitor, clade A, member 3G                                      |
| 3.771   | NM_175465 | SESTD1    | SEC14 and spectrin domains 1                                                                      |
| -2.268  | NM_009144 | SFRP2     | secreted frizzled-related protein 2                                                               |
| -5.65   | NM_172276 | SFRS8     | splicing factor, arginine/serine-rich 8 (suppressor-of-white-apricot homolog, <i>Drosophila</i> ) |
| -2.053  | NM_019812 | SIRT1     | sirtuin (silent mating type information regulation 2 homolog) 1 ( <i>S. cerevisiae</i> )          |
| -3.049  | XM_134226 | SLC25A42  | solute carrier family 25, member 42                                                               |
| 3.495   | NM_172980 | SLC28A2   | solute carrier family 28 (sodium-coupled nucleoside transporter), member 2                        |
| -2.353  | NM_139143 | SLC39A6   | solute carrier family 39 (zinc transporter), member 6                                             |
| 3.153   | NM_011410 | SLFN12    | schlafen family member 12                                                                         |
| -2.674  | NM_025690 | SLTM      | SAFB-like, transcription modulator                                                                |
| 2.592   | NM_024225 | SNX5      | sorting nexin 5                                                                                   |
| 3.421   | NM_175397 | SP110     | SP110 nuclear body protein                                                                        |
| 6.59    | NM_011355 | SPI1      | spleen focus forming virus (SFFV) proviral integration oncogene spi1                              |
| 4.106   | NM_009263 | SPP1      | secreted phosphoprotein 1                                                                         |
| 53.19   | NM_011157 | SRGN      | serglycin                                                                                         |
| -23.923 | NM_173868 | ST18      | suppression of tumorigenicity 18 (breast carcinoma) (zinc finger protein)                         |
| 3.431   | NM_021547 | STARD3    | StAR-related lipid transfer (START) domain containing 3                                           |
| 6.024   | NM_009283 | STAT1     | signal transducer and activator of transcription 1, 91kDa                                         |
| 2.496   | XM_284053 | STEAP2    | six transmembrane epithelial antigen of the prostate 2                                            |

|        |              |                           |                                                                                            |
|--------|--------------|---------------------------|--------------------------------------------------------------------------------------------|
| -4.255 | NM_008408    | STT3A                     | STT3, subunit of the oligosaccharyltransferase complex, homolog A ( <i>S. cerevisiae</i> ) |
| -2.016 | NM_009308    | SYT4                      | synaptotagmin IV                                                                           |
| 2.347  | NM_011528    | TALDO1                    | transaldolase 1                                                                            |
| 2.1    | NM_011530    | TAP2                      | transporter 2, ATP-binding cassette, sub-family B (MDR/TAP)                                |
| 5.115  | NM_011539    | TBXAS1                    | thromboxane A synthase 1 (platelet)                                                        |
| 3.081  | NM_016921    | TCIRG1                    | T-cell, immune regulator 1, ATPase, H <sup>+</sup> transporting, lysosomal V0 subunit A3   |
| 13.4   | NM_031198    | TFEC                      | transcription factor EC                                                                    |
| 7.529  | NM_177911    | TGM4                      | transglutaminase 4 (prostate)                                                              |
| 5.107  | NM_011593    | TIMP1                     | TIMP metalloproteinase inhibitor 1                                                         |
| 7.481  | NM_030682    | TLR1                      | toll-like receptor 1                                                                       |
| -2.208 | NM_080556    | TM9SF2                    | transmembrane 9 superfamily member 2                                                       |
| 2.036  | NM_025360    | TMED3                     | transmembrane emp24 protein transport domain containing 3                                  |
| 3.309  | NM_144830    | TMEM106A                  | transmembrane protein 106A                                                                 |
| -2.066 | NM_025838    | TMEM107                   | transmembrane protein 107                                                                  |
| -4.975 | NM_183311    | TMEM145                   | transmembrane protein 145                                                                  |
| 14.06  | XM_128954    | TMEM173                   | transmembrane protein 173                                                                  |
| 5.432  | NM_025326    | TMEM176A                  | transmembrane protein 176A                                                                 |
| 5.797  | NM_023056    | TMEM176B                  | transmembrane protein 176B                                                                 |
| 2.141  | NM_028355    | TMEM48                    | transmembrane protein 48                                                                   |
| 2.708  | NM_145402    | TMEM51                    | transmembrane protein 51                                                                   |
| 6.726  | NM_027206    | TNFAIP8L2                 | tumor necrosis factor, alpha-induced protein 8-like 2                                      |
| 19.51  | NM_001001495 | TNIP3                     | TNFAIP3 interacting protein 3                                                              |
| -5.076 | NM_175322    | TNKS                      | tankyrase, TRF1-interacting ankyrin-related ADP-ribose polymerase                          |
| -11.99 | NM_011620    | TNNT3                     | troponin T type 3 (skeletal, fast)                                                         |
| 2.373  | NM_152800    | TOR2A                     | torsin family 2, member A                                                                  |
| 16.28  | NM_146206    | TPCN2                     | two pore segment channel 2                                                                 |
| -2.02  | NM_009416    | TPM2                      | tropomyosin 2 (beta)                                                                       |
| 3.157  | NM_172275    | TRAFD1                    | TRAF-type zinc finger domain containing 1                                                  |
| 16.27  | NM_031254    | TREM2                     | triggering receptor expressed on myeloid cells 2                                           |
| 2.312  | NM_011637    | TREX1 (includes EG:11277) | three prime repair exonuclease 1                                                           |
| 3.743  | NM_009277    | TRIM21                    | tripartite motif-containing 21                                                             |
| 12.11  | NM_009099    | TRIM30                    | tripartite motif-containing 30                                                             |

|        |           |         |                                                                    |
|--------|-----------|---------|--------------------------------------------------------------------|
| -2.174 | NM_028063 | TRMU    | tRNA 5-methylaminomethyl-2-thiouridylate methyltransferase         |
| -3.788 | NM_012035 | TRPC7   | transient receptor potential cation channel, subfamily C, member 7 |
| -2.353 | NM_173033 | TSTD2   | thiosulfate sulfurtransferase (rhodanese)-like domain containing 2 |
| -3.472 | XM_127105 | TTC7B   | tetratricopeptide repeat domain 7B                                 |
| 3.77   | NM_181591 | TXNDC3  | thioredoxin domain containing 3 (spermatzoa)                       |
| 8.607  | NM_019449 | UNC93B1 | unc-93 homolog B1 (C. elegans)                                     |
| 2.139  | NM_026430 | UXS1    | UDP-glucuronate decarboxylase 1                                    |
| 2.666  | NM_012037 | VAT1    | vesicle amine transport protein 1 homolog (T. californica)         |
| 11.6   | NM_011691 | VAV1    | vav 1 guanine nucleotide exchange factor                           |
| 2.775  | NM_011701 | VIM     | vimentin                                                           |
| 2.601  | NM_011725 | XLR     | X-linked lymphocyte-regulated complex                              |
| 3.904  | NM_028864 | ZC3HAV1 | zinc finger CCCH-type, antiviral 1                                 |
| -2.342 | NM_011743 | ZFP106  | zinc finger protein 106 homolog (mouse)                            |
| -2.584 | NM_177643 | ZNF281  | zinc finger protein 281                                            |
| 7.019  | NM_030139 | ZNF449  | zinc finger protein 449                                            |
